# Supplementary material
Source: Springer Nature journal article supplement (https://www.springermedizin.de/resource/supplementary/12967_2011_1054_MOESM1_ESM.pdf/9573628)

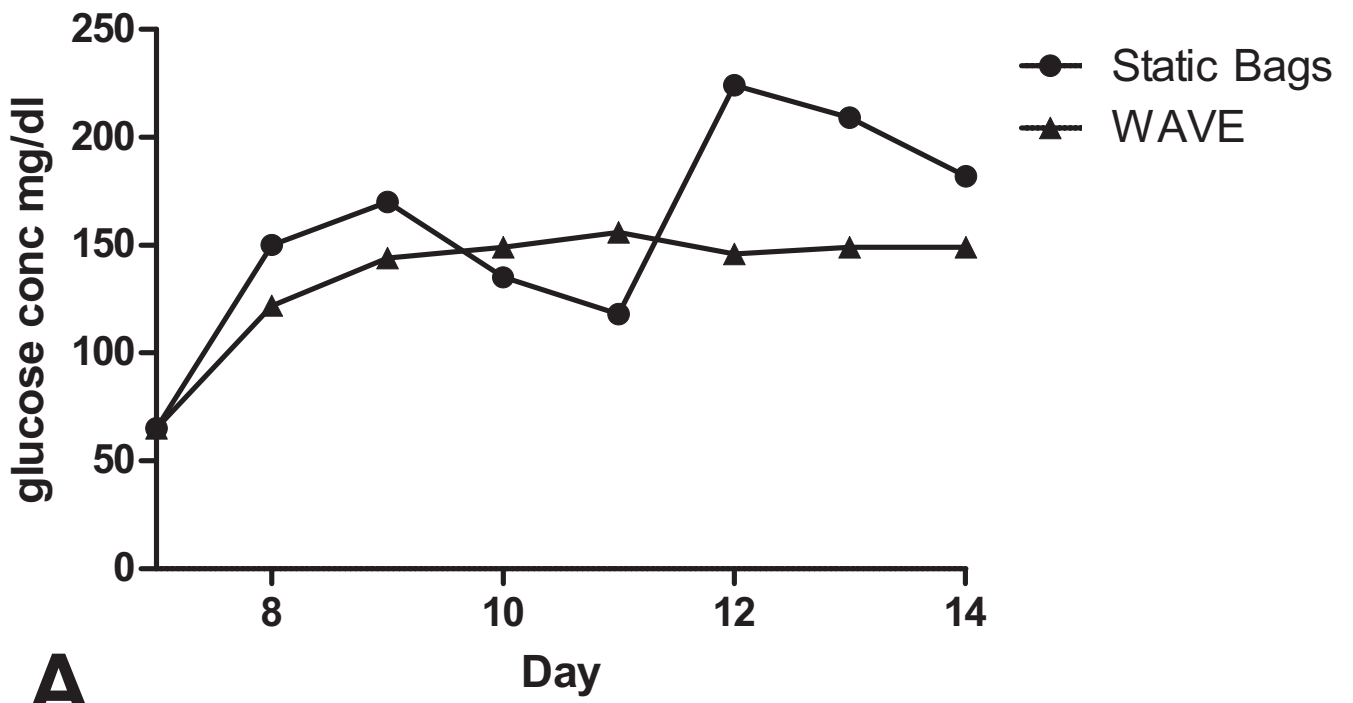

**A**

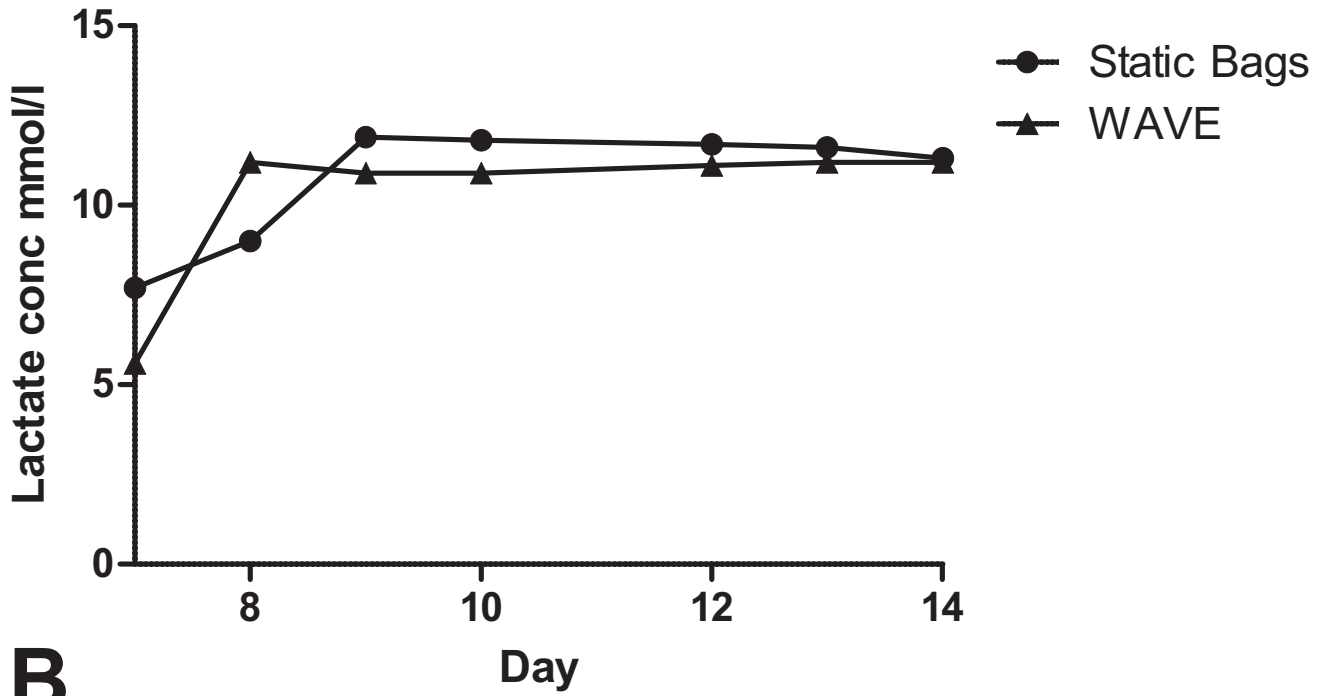

**B**

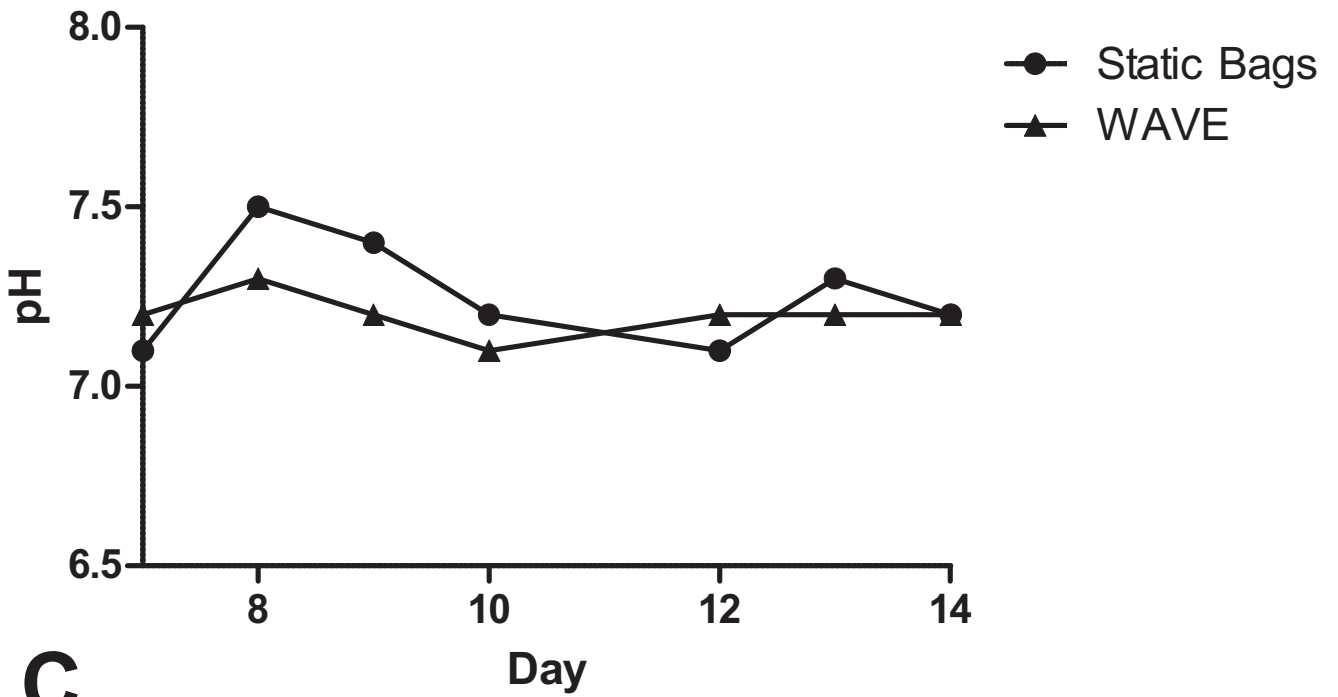

**C**

Supplement: MOESM1 [file 9573628]
